# Supplementary material for: Path-dependent hydrogen evolution reaction via selective etching of bilayer MoS2 catalysts
Source: Royal Society of Chemistry journal article supplement (doi:10.1039/d4ta03197k), 2024-01-01
Supplement: d4ta03197k1.pdf [file d4ta03197k1.pdf]

## Supporting Information

### **Path-Dependent Hydrogen Evolution Reaction via Selective Etching of Bilayer Catalysts**

Min Jung<sup>a†</sup>, Jungmoon Lim<sup>a†</sup>, Junsung Byeon<sup>a</sup>, Taehun Kim<sup>a</sup>, Younghoon Lim<sup>a</sup>, Hongju Park<sup>a</sup>,  
Jasik Eom<sup>a</sup>, Seungsub Lee<sup>a</sup>, Sangyeon Pak<sup>b\*</sup>, and SeungNam Cha<sup>a\*</sup>

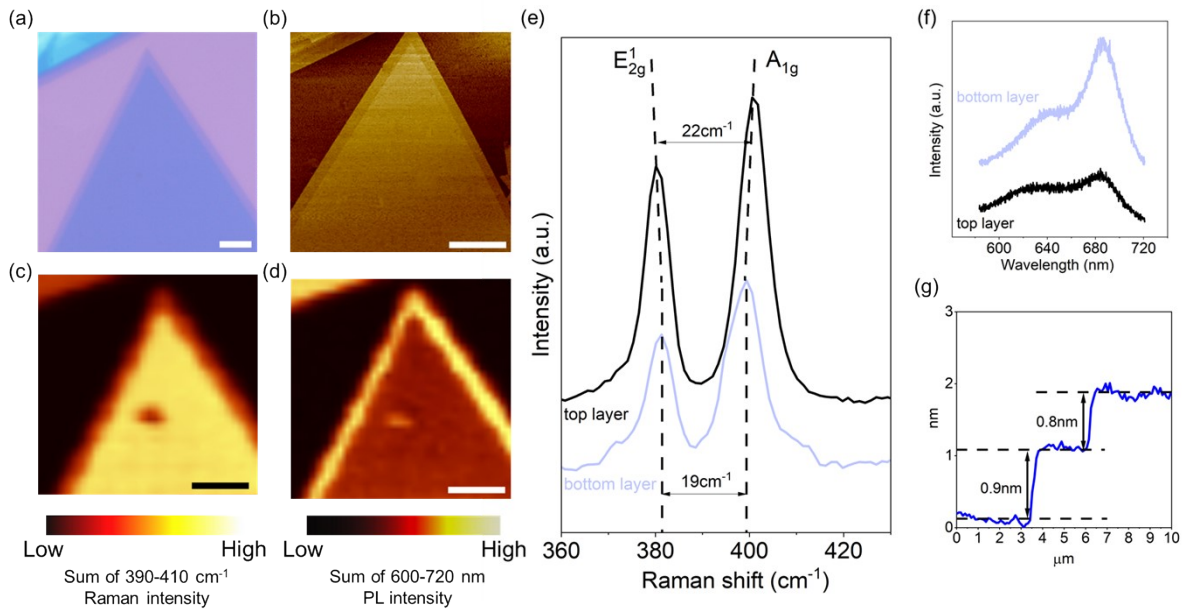

**Figure. S1.** (a) Optical microscope image of bilayer MoS<sub>2</sub> and (b) atomic force microscope mapping image. (c) Raman and (d) photoluminescence mapping of bilayer MoS<sub>2</sub>. Layer-dependent (e) Raman and (f) PL spectra from a top layer and bottom layer from of bilayer MoS<sub>2</sub>. The scale bar for all figures is 10 μm.

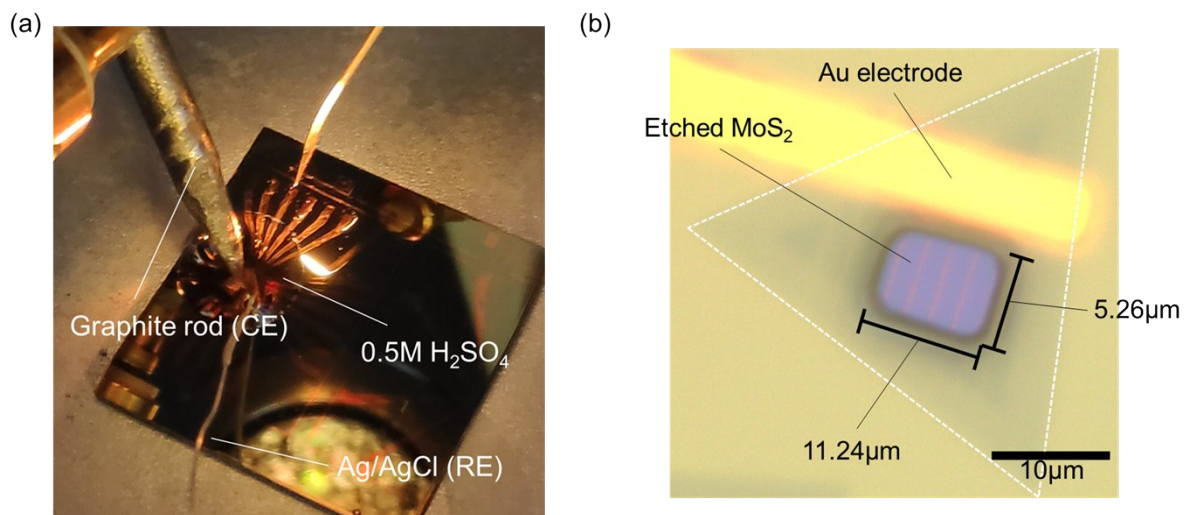

**Figure. S2.** (a) Image of setup for electrochemical analysis. (b) The optical image of etched MoS<sub>2</sub> hydrogen evolution reaction device. The opened area is 59.1 μm<sup>2</sup>.

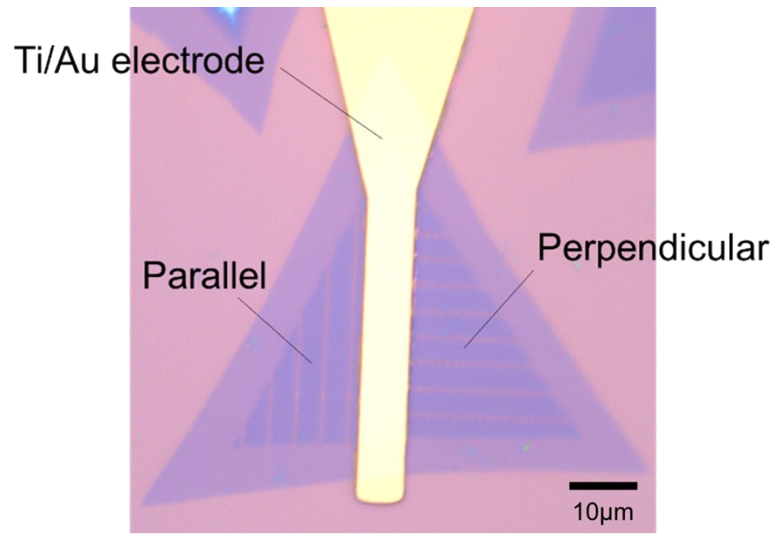

**Figure. S3.** The optical image of parallel and perpendicular direction etched MoS<sub>2</sub>.

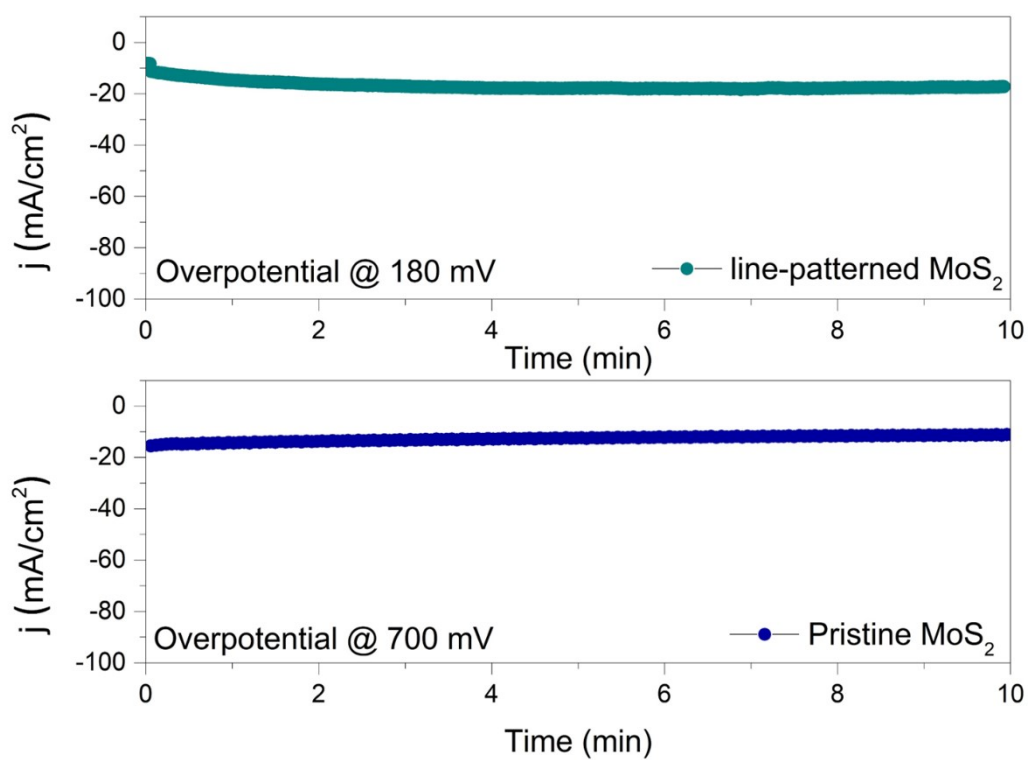

**Figure. S4.** Stability test of line-patterned and pristine bilayer MoS<sub>2</sub> catalysts.
